# Supplementary material for: Click-encoded rolling FISH for visualizing single-cell RNA polyadenylation and structures
Source: PubMed Central journal article supplement — Nucleic Acids Res. 2019 Oct 4;47(22):e145. doi: 10.1093/nar/gkz852 (PMC6902020; doi:10.1093/nar/gkz852), 2019-10-04
Supplement: gkz852_supplemental_file.pdf [file gkz852_supplemental_file.pdf]

# **Click-encoded rolling FISH for visualizing single-cell RNA polyadenylation and structures**

Feng Chen<sup>‡</sup>, Min Bai<sup>‡</sup>, Xiaowen Cao, Yue Zhao, Jing Xue and Yongxi Zhao<sup>\*</sup>

Institute of Analytical Chemistry and Instrument for Life Science, The Key Laboratory of Biomedical Information Engineering of Ministry of Education, School of Life Science and Technology, Xi'an Jiaotong University, Xianning West Road, Xi'an, Shaanxi 710049, P. R. China

<sup>‡</sup>These authors contributed equally to this work. <sup>\*</sup>To whom correspondence should be addressed. Email: yxzhao@mail.xjtu.edu.cn

## Table of Contents

|                                                                                                                           |            |
|---------------------------------------------------------------------------------------------------------------------------|------------|
| <b>Illustration of the codes and commands in MATLAB</b>                                                                   | <b>P3</b>  |
| <b>Table S1.</b> Sequence information for oligonucleotides used in this study                                             | <b>P4</b>  |
| <b>Figure S1.</b> Mass spectrum of the acylation of ATP at 2' or 3' hydroxyl by NAI-N <sub>3</sub>                        | <b>P5</b>  |
| <b>Figure S2.</b> Mass spectrum of the acylation of UTP by NAI-N <sub>3</sub>                                             | <b>P6</b>  |
| <b>Figure S3.</b> Mass spectrum of the acylation of CTP by NAI-N <sub>3</sub>                                             | <b>P7</b>  |
| <b>Figure S4.</b> Mass spectrum of the acylation of GTP by NAI-N <sub>3</sub>                                             | <b>P8</b>  |
| <b>Figure S5.</b> Representative cell images of specificity of ClickerFISH.                                               | <b>P9</b>  |
| <b>Figure S6.</b> ClickerFISH for polyadenylation labeling with MitoTracker imaging to study mitochondrial RNA processing | <b>P10</b> |
| <b>Figure S7.</b> Images of cells treated with TCO-Pso and Tz-cy3 after or before DAPI staining                           | <b>P11</b> |
| <b>Figure S8.</b> Representative cell images of RNA structures analysis by ClickerFISH.                                   | <b>P12</b> |
| <b>Figure S9.</b> Representative cell images of combining ClickerFISH with smFISH of Nup43 mRNA from MDA-MB-231.          | <b>P13</b> |
| <b>Figure S10.</b> Cell-cycle-dependent RNA flexible regions.                                                             | <b>P14</b> |
| <b>Figure S11.</b> Cell-cycle-dependent RNA duplex structures.                                                            | <b>P15</b> |

The codes and commands in MATLAB are shown below:

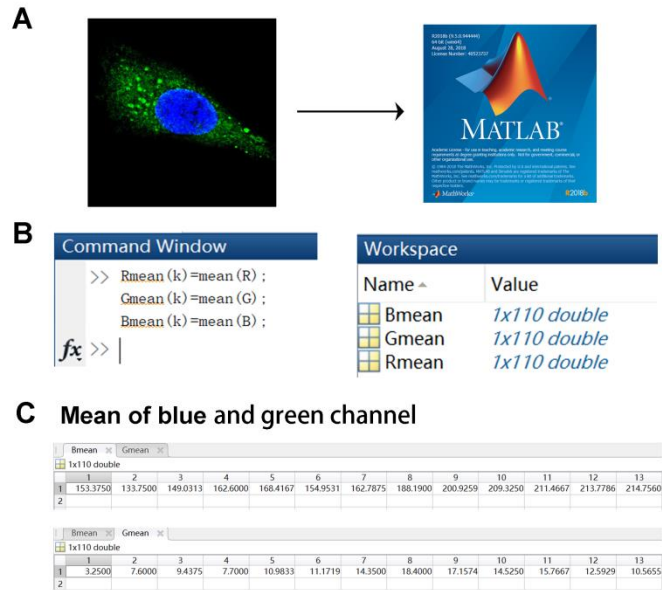

Note: (A) The single cell was opened by MATLAB. (B) The commands of average intensity within a series of annuli containing three color channels were entered in the command line window (R: red, G: green, and B: blue). (C) The form of mean of blue and green channel (green: RNA polyadenylation signal, blue: DAPI signal).

**Table S1.** Sequence information for oligonucleotides used in this study.

| Name                                   | Sequences (5'-3')                                           |
|----------------------------------------|-------------------------------------------------------------|
| <b>Probes in ClickerFISH</b>           |                                                             |
| N <sub>3</sub> -barcode                | N <sub>3</sub> -GCTATGTTTCTTGAGGAGGGCAGCAA                  |
| Linker 1 (L1)                          | TTTCTTGAGGAGGGCAGCAA                                        |
| Padlock 1 (P1)                         | P-CCTCAAGAAATCGACGCGTATAATAATGCTGGGCTCTAGTAGGTCTTGCTGCCCT   |
| DBCO-barcode                           | <b>DBCO</b> -GGAGTGCAGCAAACGGGAAGAGTCTT                     |
| Linker 2 (L2)                          | CAGCAAACGGGAAGAGTCTT                                        |
| Padlock 2 (P2)                         | P-CCGTTTGTGTGGCCTGAGCCTTCTCGGTACGGTCTGTAAGGTCAAGACTCTTC     |
| NH <sub>2</sub> -barcode               | <b>NH<sub>2</sub></b> -ATCCTCGTAAATCCTCATCAATCATC           |
| Linker 3 (L3)                          | GTAAATCCTCATCAATCATC                                        |
| Padlock 3 (P3)                         | P-GAGGATTTACTCGACAGAGCTTACTCACAGCCAGCATCACAAGGTGCGATGATTGAT |
| FAM-probe                              | GCGTATAATAATGCTGGGCTCTAGT- <b>FAM</b>                       |
| Cy5-probe                              | <b>Cy5</b> -TGAGCCTTCCCTCGGTACGGTCTGTA                      |
| Cy3-probe                              | <b>Cy3</b> -AGAGCTTACTCACAGCCAGCATCACA                      |
| <b>Probes in smFISH for NUP43 mRNA</b> |                                                             |
| Guide-1                                | ACTAGAGCCCAGCATTATTATACGCCGACGAGGCTACTGCAAAAA               |
| Guide-2                                | ACTAGAGCCCAGCATTATTATACGCACTTCGCATAAAATTCCTCC               |
| Guide-3                                | ACTAGAGCCCAGCATTATTATACGCTTTGCTGATTTTCTGGGACA               |
| Guide-4                                | ACTAGAGCCCAGCATTATTATACGCAAGATCCTGTAGCGAACGTC               |
| Guide-5                                | ACTAGAGCCCAGCATTATTATACGCATCACCATGGTGTCTGATAT               |
| Guide-6                                | ACTAGAGCCCAGCATTATTATACGCTGCTGGTTGACTGACAGAG                |
| Guide-7                                | ACTAGAGCCCAGCATTATTATACGCCCTCTCCAACTGTAACGATT               |
| Guide-8                                | ACTAGAGCCCAGCATTATTATACGCACAGCATGGAGTGTACTACT               |
| Guide-9                                | ACTAGAGCCCAGCATTATTATACGCATCCCATATTTTCAACTGTC               |
| Guide-10                               | ACTAGAGCCCAGCATTATTATACGCTATCAACACAGTGGAGTGGC               |
| Guide-11                               | ACTAGAGCCCAGCATTATTATACGCAACATGCTGTTGGTTGGGAT               |
| Guide-12                               | ACTAGAGCCCAGCATTATTATACGCCCATCTTCAGAGCAGGTAATA              |
| Guide-13                               | ACTAGAGCCCAGCATTATTATACGCGCTTGTGATTTC AATTCGGT              |
| Guide-14                               | ACTAGAGCCCAGCATTATTATACGCGTTCACAGACAGAGACCTAC               |
| Guide-15                               | ACTAGAGCCCAGCATTATTATACGCGGTAATTGCATGTTCTATC                |
| Guide-16                               | ACTAGAGCCCAGCATTATTATACGCGGATTCTACAACGTTTGGG                |
| Guide-17                               | ACTAGAGCCCAGCATTATTATACGCCACAAGCTGTCTGTCAATA                |
| Guide-18                               | ACTAGAGCCCAGCATTATTATACGCCCATAAACCACCTGATGTG                |
| Guide-19                               | ACTAGAGCCCAGCATTATTATACGCAATTGTAGGAACCCATTGGTA              |
| Guide-20                               | ACTAGAGCCCAGCATTATTATACGCAAGTGTATATGCCACATACT               |
| Guide-21                               | ACTAGAGCCCAGCATTATTATACGCTTAACATTGGCAACTGCCAC               |
| Guide-22                               | ACTAGAGCCCAGCATTATTATACGCAAGTGTAAAGAGTCTCTGCTCA             |
| Guide-23                               | ACTAGAGCCCAGCATTATTATACGCAATTGCACAATGTCCAGTTTG              |
| Guide-24                               | ACTAGAGCCCAGCATTATTATACGCTGGTAACACTATAGGTGGCT               |
| Guide-25                               | ACTAGAGCCCAGCATTATTATACGCTAGTTCATTATTATCCCTGC               |
| Guide-26                               | ACTAGAGCCCAGCATTATTATACGCTGTCAATTAAGGTCTCAGGTC              |
| Guide-27                               | ACTAGAGCCCAGCATTATTATACGCGGCAAACTTGTC AATTGGC               |
| Guide-28                               | ACTAGAGCCCAGCATTATTATACGCCACTCTATTGACAGTTTCA                |
| Guide-29                               | ACTAGAGCCCAGCATTATTATACGCCTCACACACTAAAACCCTGC               |
| Guide-30                               | ACTAGAGCCCAGCATTATTATACGCGGATTGAGTGTGTTTGGATCC              |
| Guide-31                               | ACTAGAGCCCAGCATTATTATACGCACAATAGGACTGTACCCCTT               |
| Guide-32                               | ACTAGAGCCCAGCATTATTATACGCCTCACATCATCAGTGTGTTA               |
| Guide-33                               | ACTAGAGCCCAGCATTATTATACGCAACAACCTGGTGATTGGCTCA              |
| Guide-34                               | ACTAGAGCCCAGCATTATTATACGCAAAGCGTCCCAACACAAAGC               |
| Guide-35                               | ACTAGAGCCCAGCATTATTATACGCTAATGACAGACTGGTGAACA               |
| Guide-36                               | ACTAGAGCCCAGCATTATTATACGCTGATTTTCTCCACATGTTT                |
| Guide-37                               | ACTAGAGCCCAGCATTATTATACGCTCATAGGAAATACTTGCAAT               |
| Guide-38                               | ACTAGAGCCCAGCATTATTATACGCTCAAAATGTGAAACTGTAT                |
| FAM-probe                              | GCGTATAATAATGCTGGGCTCTAGT- <b>FAM</b>                       |

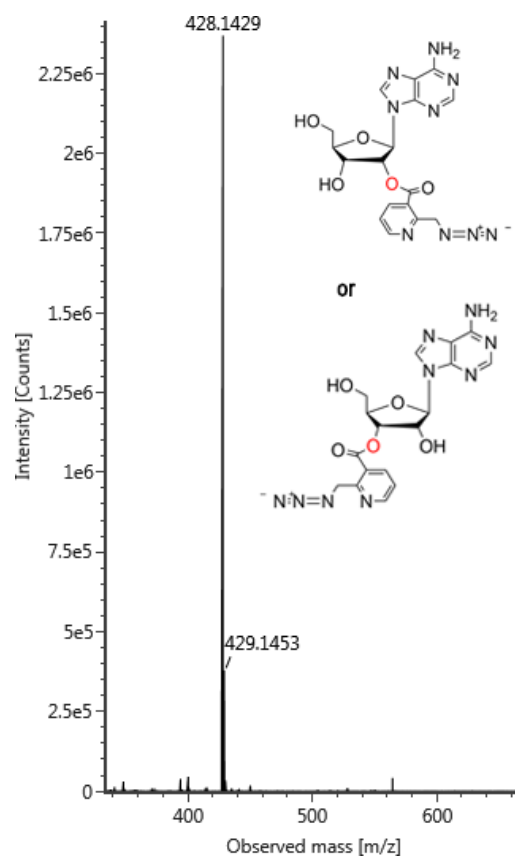

**Figure S1.** Mass spectrum of the acylation of ATP at 2' or 3' hydroxyl by NAI-N<sub>3</sub>. Calculated mass of [C<sub>17</sub>H<sub>18</sub>N<sub>9</sub>O<sub>5</sub>]<sup>-</sup> = 428.1425, found: 428.1429.

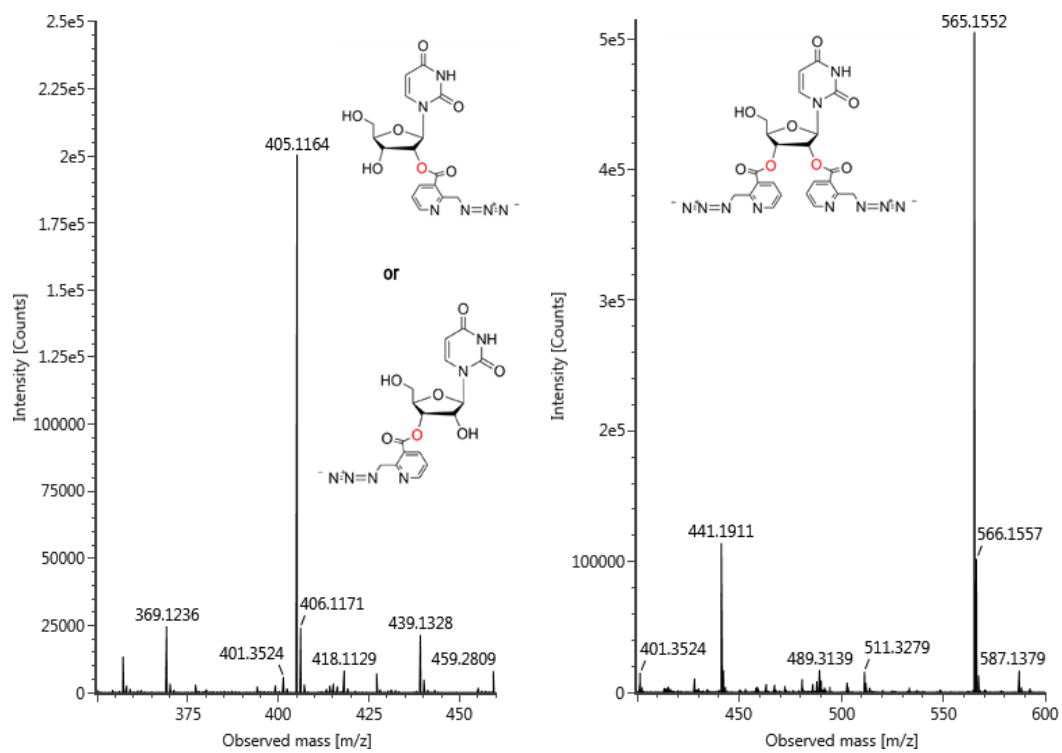

**Figure S2.** Mass spectrum of the acylation of UTP by NAI-N<sub>3</sub> (left, calculated mass of [C<sub>16</sub>H<sub>17</sub>N<sub>3</sub>O<sub>7</sub>]<sup>+</sup> = 405.1153, found: 405.1164) and UTP-2NAI-N<sub>3</sub> (right, calculated mass of [C<sub>23</sub>H<sub>21</sub>N<sub>10</sub>O<sub>8</sub>]<sup>+</sup> = 565.1538, found: 565.1552).

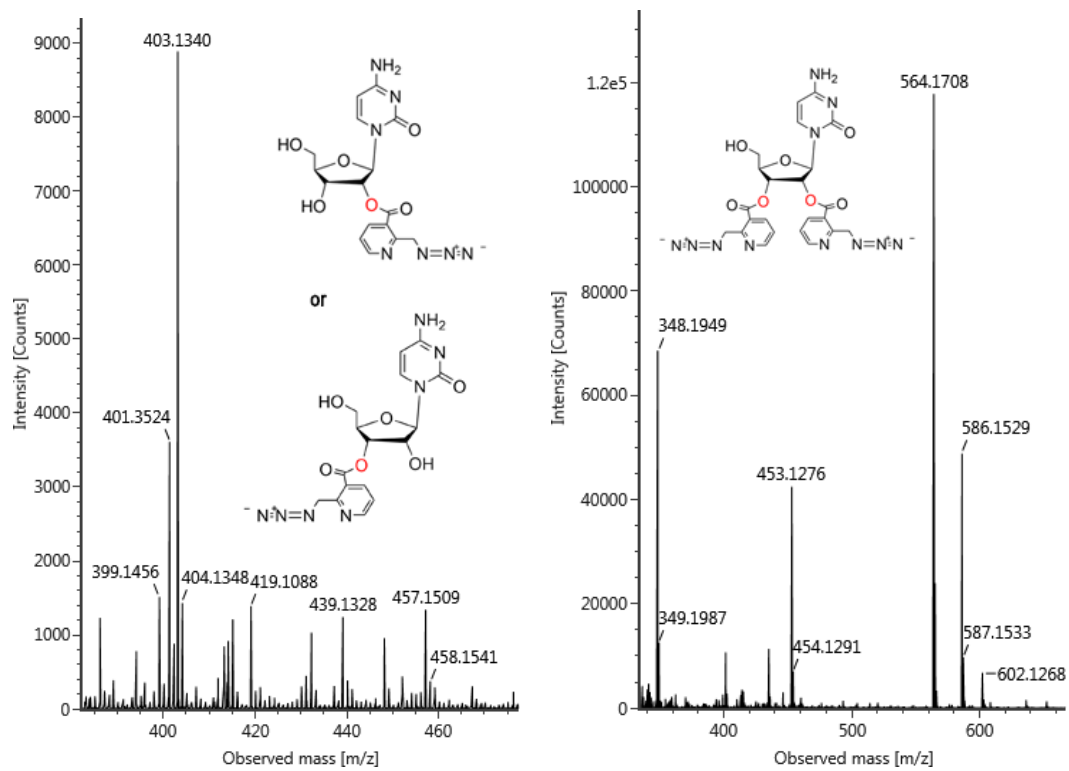

**Figure S3.** Mass spectrum of the acylation of CTP by NAI-N<sub>3</sub> (left, calculated mass of [C<sub>16</sub>H<sub>18</sub>N<sub>7</sub>O<sub>6</sub>]<sup>+</sup> = 404.1313, found: 404.1348) and CTP-2NAI-N<sub>3</sub> (right, calculated mass of [C<sub>23</sub>H<sub>22</sub>N<sub>11</sub>O<sub>7</sub>]<sup>+</sup> = 564.1698, found: 564.1708).

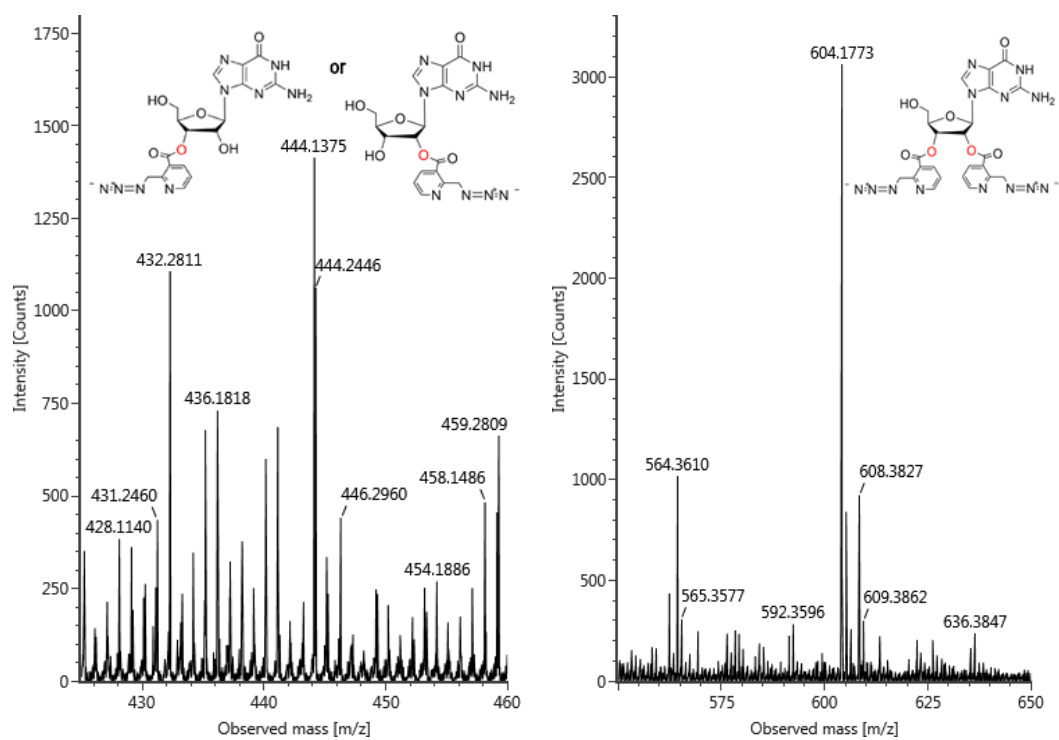

**Figure S4.** Mass spectrum of the acylation of GTP by NAI-N<sub>3</sub> (left, calculated mass of [C<sub>17</sub>H<sub>18</sub>N<sub>9</sub>O<sub>6</sub>]<sup>+</sup> = 444.1375, found: 444.1375) and GTP-2NAI-N<sub>3</sub> (right, calculated mass of [C<sub>24</sub>H<sub>22</sub>N<sub>13</sub>O<sub>7</sub>]<sup>+</sup> = 604.1760, found: 604.1773).



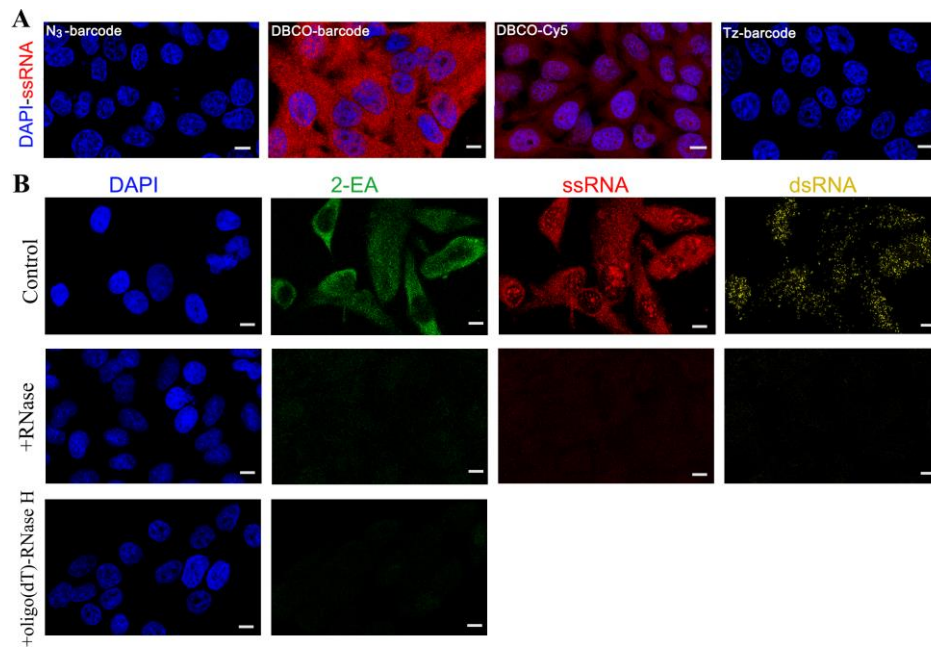

**Figure S5.** (A) Representative cell images by DBCO-barcode-specific ClickerFISH for mapping flexible or single-stranded RNA regions (red, RNA single-stranded regions; blue, DAPI). The sample treating with DBCO-cy5 is the control of non-amplifying system. Other two negative controls of N<sub>3</sub>-barcode and Tz-barcode demonstrated the sequence specificity of ClickerFISH. The scale bars of all cell images in this work is 10  $\mu$ m. (B) Negative ClickerFISH experiments of cell samples treated with RNase I or oligo(dT)-RNase H prior to ClickerFISH reactions.

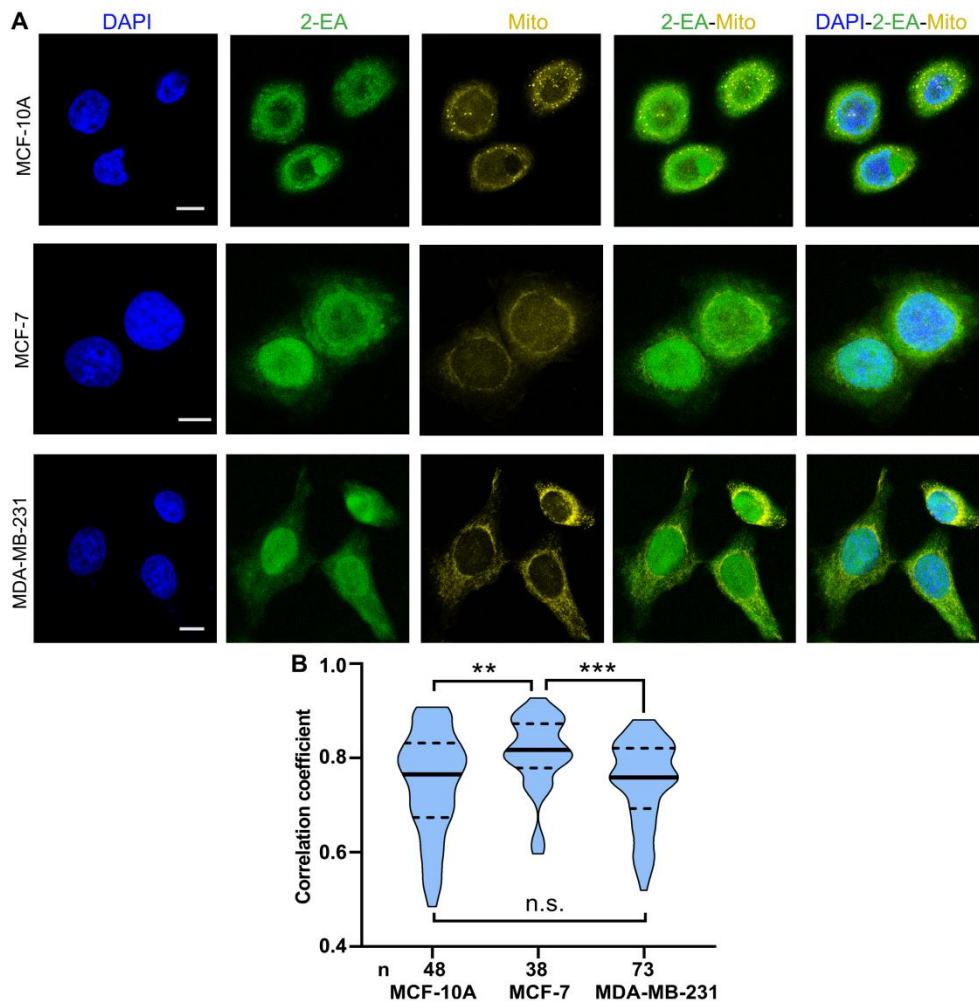

**Figure S6.** ClickerFISH for polyadenylation labeling with MitoTracker imaging to study mitochondrial RNA processing. (A) Representative cell images. (B) The violin plot represents of the correlation coefficients between RNA polyadenylation signal and MitoTracker signals. \*\*( $p < 0.005$ ), \*\*\*( $P < 0.0001$ ), Student t-test.

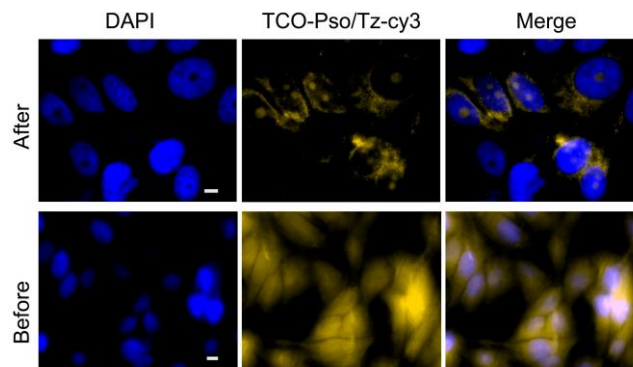

**Figure S7.** Images of cells treated with TCO-Pso and Tz-cy3 after or before DAPI staining. Above, the fixed cells were firstly incubated with 0.5  $\mu\text{g}/\text{mL}$  DAPI for 20 min at room temperature. After three washes, these cells were incubated with 0.4 mM TCO-Pso in PBS for 10 min and then were irradiated with 365 nm UV radiation for 20 min. The click reaction was performed by incubating cells with 5 mM Tz-cy3 for 1 h at 37  $^{\circ}\text{C}$  in the dark. Below, the fixed cells were firstly incubated with 0.4 mM TCO-Pso in PBS for 10 min and then were irradiated with 365 nm UV radiation for 20 min. The click reaction was performed by incubating cells with 5 mM Tz-cy3 for 1 h at 37  $^{\circ}\text{C}$  in the dark. After three washes, the cells were stained with 0.5  $\mu\text{g}/\text{mL}$  DAPI for 20 min at room temperature. Scale bar=10  $\mu\text{m}$ . The fluorescence images were acquired using a fluorescent inverted microscope (Eclipse Ti, Nikon).

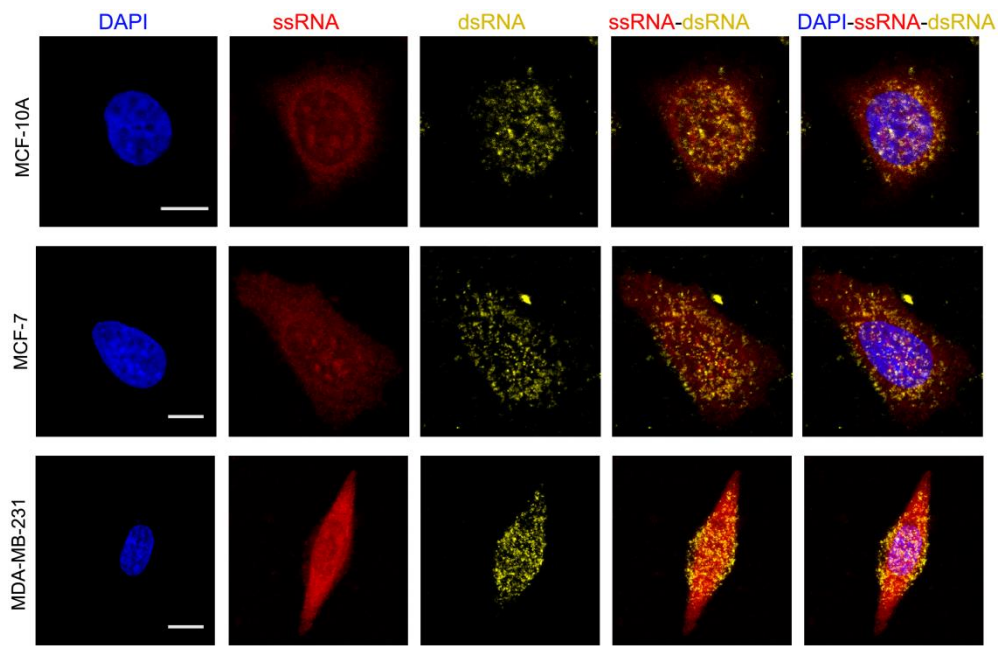

**Figure S8.** Representative cell images of RNA structures analysis by ClickerFISH.

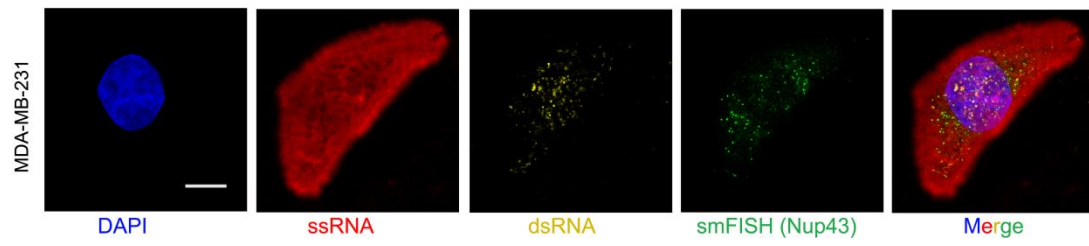

**Figure S9.** Representative cell images of combining ClickerFISH with smFISH of Nup43 mRNA from MDA-MB-231.

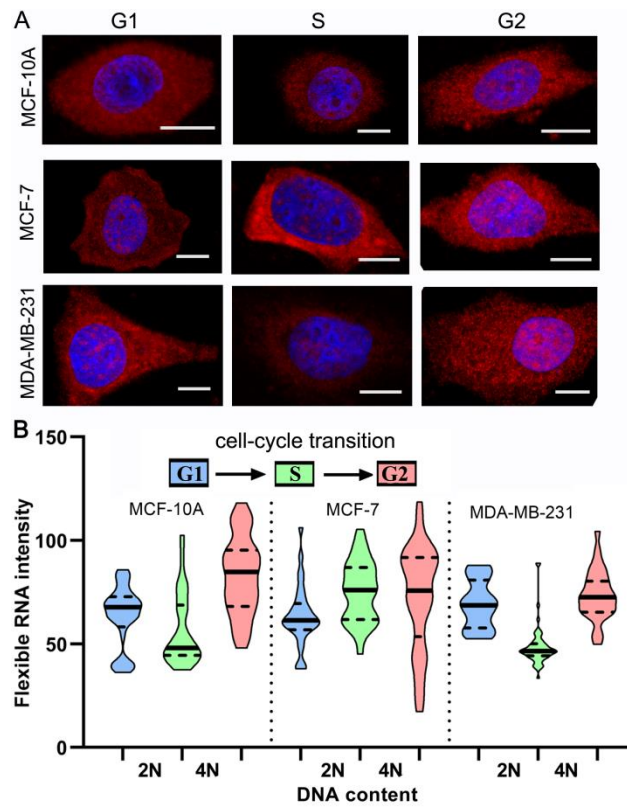

**Figure S10.** Cell-cycle-dependent RNA flexible regions. (A) Representative cell images (red, fluorescence of flexible regions; blue, DAPI; scale bar, 10  $\mu$ m). (B) The violin plot (G1, blue; S, green; G2, pink) depicting RNA flexible regions intensity distribution. The cell numbers are 43, 49, 39, 30, 33, 50, 27, 57 and 28, respectively (from left to right).

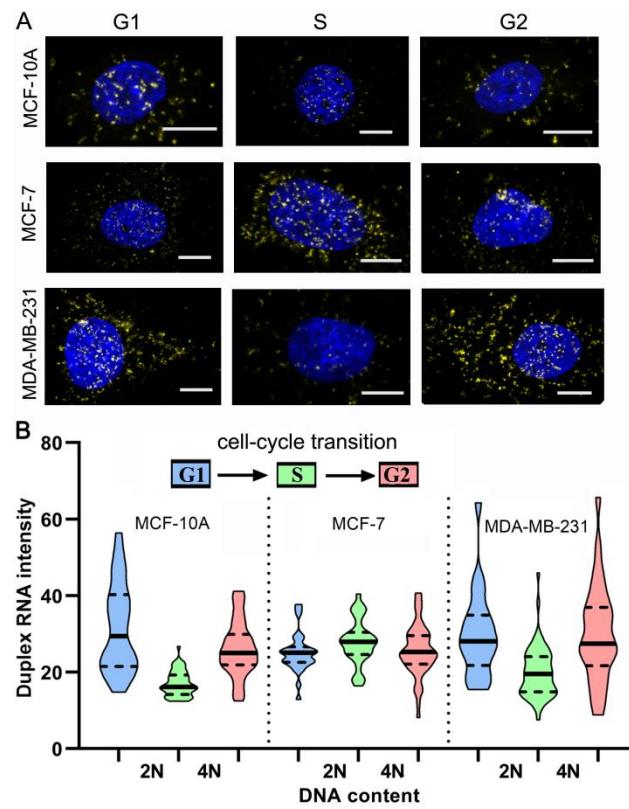

**Figure S11.** Cell-cycle-dependent RNA duplex structures. (A) Representative cell images (yellow, fluorescence of duplex structures; blue, DAPI; scale bar, 10  $\mu$ m). (B) The violin plot (G1, blue; S, green; G2, pink) depicting RNA duplex structures intensity distribution. The cell numbers are 43, 49, 39, 30, 33, 50, 27, 57 and 28, respectively (from left to right).
